# Supplementary material for: Red to near-infrared piezochromism from AIE-active luminophores: isolated dimers facilitating a wide-range redshift
Source: Royal Society of Chemistry journal article supplement (doi:10.1039/d2nj00901c), 2022-01-01
Supplement: d2nj00901c1.pdf [file d2nj00901c1.pdf]

## Experimental section

**Materials:** Isopropyl chloroformate, and 4-aminobenzyl cyanide were purchased from Alfa Aesar Co. Ltd. Other reagents were obtained from Sigma-Aldrich or Aladdin Chemicals and used without further purification. Solvents were purified according to standard laboratory methods.

**Instrumentation:**  $^1\text{H}$  NMR and  $^{13}\text{C}$  NMR of correlative derivatives were recorded on a Brüker AM500 spectrometer using Tetramethyl silane (TMS,  $\delta=0$  ppm) as internal standard. The Time-resolved PL decay spectra of the samples were also performed on an Edinburgh FLS980 fluorescence spectrometer at room temperature. PL measurements at room temperature were obtained on a SENS-9000 (Gilden Photonics, England). The digital photo-graphs were captured by the 550D digital cameras (Canon, Japan). Absolute PL quantum yields (**PLQYs**) were determined with a spectrometer C11347 (Hamamatsu, Japan). Powder X-ray diffraction experiments were measured on a Philips X'Pert Pro diffractometer (Netherlands). Measurements were made in a  $2\theta$  range of  $5\text{-}45^\circ$  at room temperature with a step of  $0.02^\circ$  ( $2\theta$ ). The scan speed was 2 degree/min. The UV-vis absorption spectra were obtained on a Shimadzu UV-2600 spectrophotometer (Japan). Single crystal X-ray diffraction data were collected on a Rigaku R-AXIS RAPID diffractometer using the  $\omega$ -scan mode with graphite-monochromator  $\text{Mo}\cdot\text{K}\alpha$  radiation. The structures were solved with direct methods using the SHELXTL programs and refined with full-matrix least-squares on  $F^2$ .



evaporated in vacuo to give a yellow solid (1.41 g), which was purified further by chromatography on silica with EtOAc/PE as the eluent. Yield 1.13g(51.8%).

$^1\text{H}$  NMR (400 MHz,  $\text{CDCl}_3$ )  $\delta$  7.42 (d,  $J=8$  Hz, 2H), 7.27 (d, 2H), 6.66 (s, 1H), 5.07-4.99 (m, 1H), 3.72 (s, 2H), 1.32 (d,  $J=8$  Hz, 2H);  $^{13}\text{C}$  NMR (100 MHz,  $\text{CDCl}_3$ )  $\delta$  = 153.22, 138.11, 128.59, 124.36, 119.12, 118.04, 68.94, 22.98, 22.08; HRMS (ESI,  $m/z$ ): Calcd for  $\text{C}_{12}\text{H}_{15}\text{N}_2\text{O}_2$ : 219.1134  $[\text{M}]^+$ ; Found: 219.1127; m.p.: 187.7 °C

**Synthesis of TDIS:** The mixture of **TDCHO** (0.407g, 1mmol) and PhIS (0.259g, 1.2mmol) in dry ethanol (30 mL) was stirred for 5 min. And then, a small amount of  $\text{CH}_3\text{ONa}$  were added, and stirred for 18 hours at the room temperature. The desired target product TDIS was filtered and washed with EtOH three times to give deep red powder (0.473g, 78%).

$^1\text{H}$  NMR (400 MHz,  $\text{CDCl}_3$ )  $\delta$  8.72 (d,  $J=7.6$  Hz, 1H), 8.5 (s, 1H), 7.94(d,  $J=8.4$  Hz, 2H), 7.84 (d,  $J=7.6$  Hz, 1H), 7.79 (d,  $J=8.8$  Hz, 2H), 7.55 (d,  $J=8.8$  Hz, 2H), 7.33 (t,  $J=8.4$  Hz, 4H), 7.21-7.24 (m, 6H), 7.11 (t,  $J=7.2$  Hz, 2H), 6.71 (s, 1H), 5.11-5.06 (m, 1H), 1.35 (d,  $J=6.4$  Hz, 6H);  $^{13}\text{C}$  NMR (100 MHz,  $\text{CDCl}_3$ )  $\delta$  = 155.06, 153.12, 152.86, 148.67, 147.24, 139.48, 135.38, 133.88, 130.11, 129.90, 129.43, 128.93, 127.88, 127.06, 126.92, 125.18, 125.03, 123.64, 122.37, 118.66, 118.15, 112.07, 69.21, 22.10; HRMS (ESI,  $m/z$ ): Calcd for  $\text{C}_{37}\text{H}_{30}\text{N}_5\text{O}_2\text{S}$ : 608.2120  $[\text{M}+\text{H}]^+$ ; Found: 608.2109; m.p.: 187.7 °C

**Table S1** Crystal data and structure refinement for crystals **TDCH** and **TDIS**.

| Samples                                            | TDCH<br>(CCDC: 2150504)                                         | TDIS<br>(CCDC: 2150513)                                         |
|----------------------------------------------------|-----------------------------------------------------------------|-----------------------------------------------------------------|
| Formula                                            | C <sub>65</sub> H <sub>75</sub> N <sub>5</sub> O <sub>3</sub> S | C <sub>37</sub> H <sub>29</sub> N <sub>5</sub> O <sub>2</sub> S |
| <i>Mr</i>                                          | 1006.36                                                         | 607.71                                                          |
| Temperature (K)                                    | 150.0                                                           | 170.0                                                           |
| Crystal system                                     | triclinic                                                       | monoclinic                                                      |
| Space group                                        | P1                                                              | C2/c                                                            |
| Crystal size (mm)                                  | 0.12 × 0.08 × 0.05                                              | 0.15 × 0.08 × 0.05                                              |
| <i>a</i> (Å)                                       | 10.1099(2)                                                      | 22.881(3)                                                       |
| <i>b</i> (Å)                                       | 12.6710(3)                                                      | 7.8734(9)                                                       |
| <i>c</i> (Å)                                       | 22.5816(5)                                                      | 35.026(4)                                                       |
| $\alpha$ (°)                                       | 77.0490(10)                                                     | 90                                                              |
| $\beta$ (°)                                        | 79.9500(10)                                                     | 103.060(7)                                                      |
| $\gamma$ (°)                                       | 89.7300(10)                                                     | 90                                                              |
| <i>V</i> (Å <sup>3</sup> )                         | 2774.13(11)                                                     | 6146.6(13)                                                      |
| <i>Z</i>                                           | 2                                                               | 8                                                               |
| <i>D</i> <sub>calc</sub> (mg/m <sup>3</sup> )      | 1.205                                                           | 1.313                                                           |
| Theta Range (°)                                    | 4.08 ~ 149.332                                                  | 4.776 ~ 52.812                                                  |
| F (000)                                            | 1080.0                                                          | 2544.0                                                          |
| <i>h, k, l</i> <sub>max</sub>                      | 12,15,28                                                        | 28,9,43                                                         |
| N <sub>ref</sub>                                   | 100088                                                          | 6303                                                            |
| T <sub>min</sub> , T <sub>max</sub>                | 0.916,0.955                                                     | 0.986,0.993                                                     |
| Independent reflections                            | 21184                                                           | 6271                                                            |
| Goodness-of-fit on F <sup>2</sup>                  | 1.027                                                           | 1.055                                                           |
| <i>R</i> <sub>int</sub>                            | 0.0357                                                          | 0.0600                                                          |
| <i>R</i> <sub>1</sub> [ <i>I</i> >2σ( <i>I</i> )]  | 0.0458                                                          | 0.0500                                                          |
| <i>wR</i> <sub>2</sub> [ <i>I</i> >2σ( <i>I</i> )] | 0.1186                                                          | 0.1227                                                          |
| <i>R</i> <sub>1</sub> (all data)                   | 0.0494                                                          | 0.0797                                                          |
| <i>wR</i> <sub>2</sub> (all data)                  | 0.1228                                                          | 0.1429                                                          |
| S                                                  | 1.027                                                           | 1.055                                                           |

$$R_1 = \Sigma||F_o| - |F_c||/\Sigma|F_o|, wR_2 = [\Sigma w(F_o^2 - F_c^2)^2/\Sigma w(F_o^2)^2]^{1/2}$$

The change in magnitude of the dipole moment between the ground and excited states, that is,  $\Delta\mu = |\mu_e - \mu_g|$  can be estimated using the Lippert–Mataga equation

$$hc(v_a - v_f) = hc(v_a^0 - v_f^0) + \frac{2(\mu_e - \mu_g)^2}{a_0^3} f(\varepsilon, n)$$

Where  $a_0$  is the cavity radius in which the solute resides, estimated to be 9.7 Å.  $\mu_g$  is the ground-state dipole moment, estimated to be 3.4 D ( $\omega$ B97X at the basis set level of 6-31G\*\*),  $\mu_e$  is the excited state dipole moment.  $h$  and  $c$  are Planck’s constant and the speed of light, respectively, and  $f(\varepsilon, n)$  is the orientation polarizability, defined as

$$f(\varepsilon, n) = \frac{\varepsilon - 1}{2\varepsilon + 1} - \frac{n^2 - 1}{2n^2 - 1}$$

Where  $\varepsilon$  is the static dielectric constant and  $n$  is the optical refractivity index of the solvent. Through the analysis of the fitted line in low-polarity solvents, its corresponding  $\mu_e$  was calculated to be 11.1 D according to Lippert-Mataga equation. However, in high-polarity solvents, the  $\mu_e$  was increased to 19.2 D.

**Table S2** Detailed photo-physical data of **TDCH** in the different solvents

| Solvents        | $f$    | $\lambda_{\text{abs}}$<br>nm | $\lambda_{\text{flu}}$<br>nm | $\nu_a$<br>cm <sup>-1</sup> | $\nu_f$<br>cm <sup>-1</sup> | $\nu_a - \nu_f$<br>cm <sup>-1</sup> | PLQYs |
|-----------------|--------|------------------------------|------------------------------|-----------------------------|-----------------------------|-------------------------------------|-------|
| Hexane          | 0.0012 | 488                          | 568                          | 20492                       | 17606                       | 2886                                | 99.5% |
| Toluene         | 0.014  | 492                          | 610                          | 20325                       | 16393                       | 3932                                | 95.6% |
| Butyl ether     | 0.096  | 489                          | 610                          | 20450                       | 16393                       | 4056                                | 88.9% |
| Isopropyl ether | 0.145  | 487                          | 612                          | 20534                       | 16340                       | 4194                                | 91.3% |
| Ethyl ether     | 0.167  | 485                          | 620                          | 20619                       | 16129                       | 4490                                | 91.5% |
| THF             | 0.210  | 485                          | 658                          | 20619                       | 15198                       | 5421                                | 59.3% |
| DCM             | 0.217  | 485                          | 674                          | 20619                       | 14836                       | 5783                                | 56.3% |
| DMF             | 0.276  | 481                          | 722                          | 20790                       | 13850                       | 6940                                | 2.7%  |
| Acetone         | 0.284  | 477                          | 690                          | 20964                       | 14493                       | 6472                                | 8.1%  |
| Acetonitrile    | 0.305  | 470                          | 708                          | 21277                       | 14124                       | 7152                                | 2.6%  |

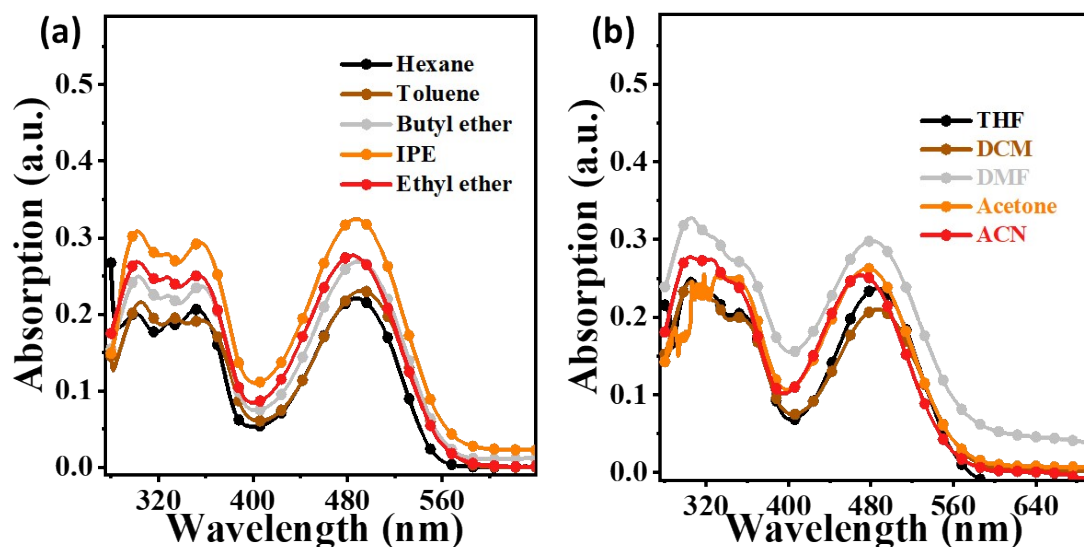

**Fig. S1** The UV absorption spectra of TDCH, measured in the different solvents with increasing polarity (the orientational polarizability of solvent,  $\Delta f$ , –hexane: 0.0012; toluene: 0.014; butyl ether: 0.096; isopropyl ether (IPE): 0.145; ethyl ether: 0.167; tetrahydrofuran (THF): 0.210; methylene chloride (DCM): 0.217; N,N-dimethylformamide (DMF): 0.276; Acetone: 0.284; and acetonitrile (ACN): 0.305).

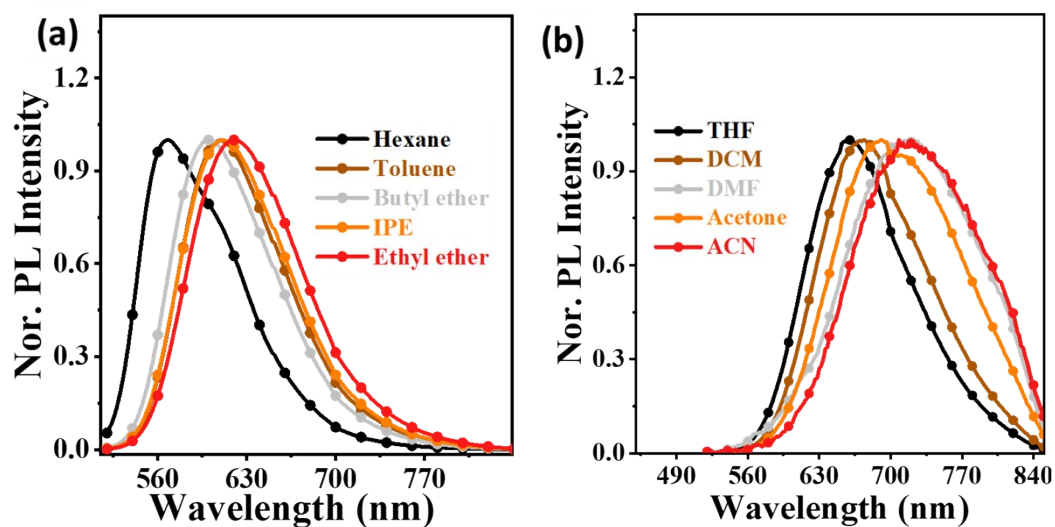

**Fig. S2** PL spectra of TDCH in the different solvents (the orientational polarizability,  $\Delta f$ , –hexane: 0.0012; toluene: 0.014; butyl ether: 0.096; isopropyl ether (IPE): 0.145; ethyl ether: 0.167; tetrahydrofuran (THF): 0.210; methylene chloride (DCM): 0.217; N,N-dimethylformamide (DMF): 0.276; Acetone: 0.284; and acetonitrile (ACN): 0.305.), the excitation wavelength is 450 nm.

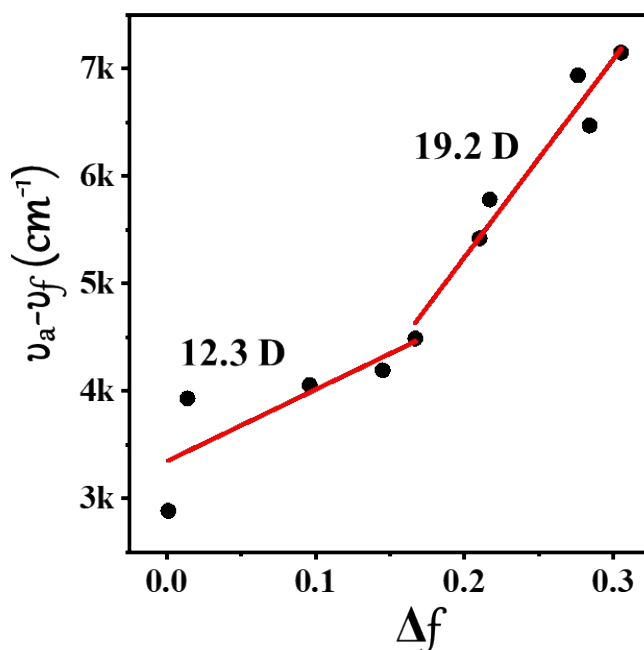

**Fig. S3** Linear fitting of orientation polarization ( $\Delta f$ ) of the solvent media with the Stokes shift ( $\nu_a - \nu_f$ ) for TDCH (the detailed data are listed in Table S2, Supporting Information);

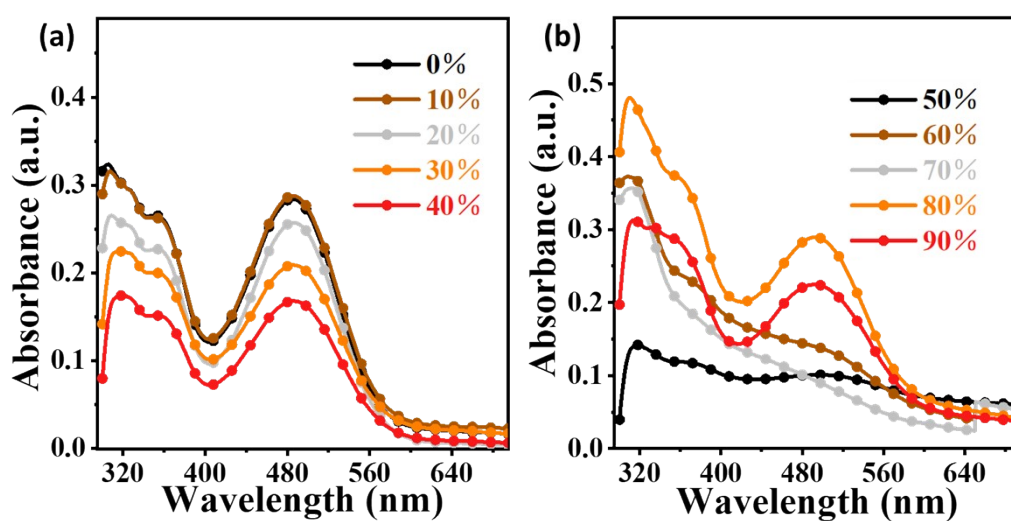

**Fig. S4** a,b) The UV absorption spectra of TDCH ( $10 \mu\text{M}$ ) in THF/water mixtures with different water fractions ( $f_w$ ). The absorption spectra of the luminophor in THF and in mixtures of less than 50% H<sub>2</sub>O with THF were almost identical. However, above 50% volume fraction ( $f_w$ ) of water, the absorption bands became more intense and moved to longer wavelengths. Moreover, tailing was clearly observed in visible region, and this absorption was due to the presence of nanoparticle suspensions.

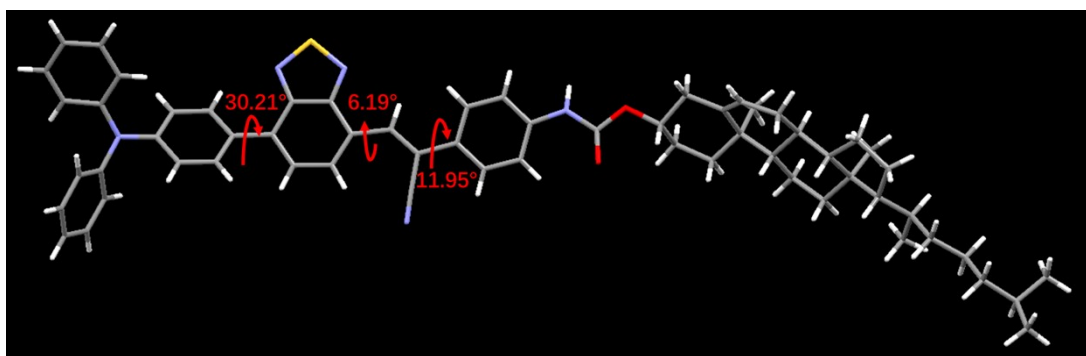

Fig. S5 Dihedral angles between acrylonitrile and BTA as well as benzene units

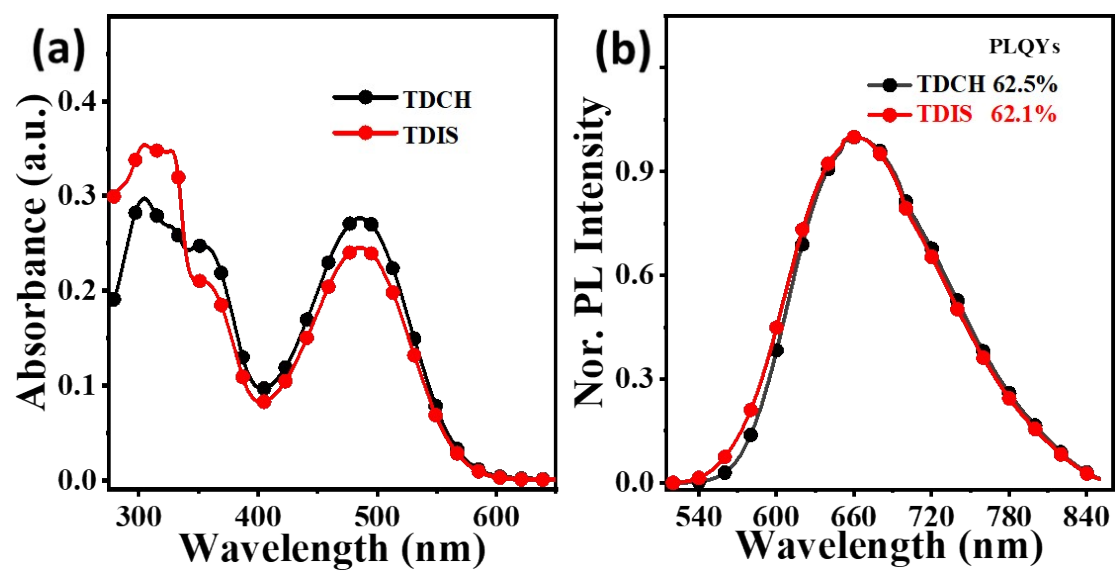

Fig. S6 The UV absorption spectra (a) and PL spectra (b) of TDCH and TDIS in THF (10 μM)



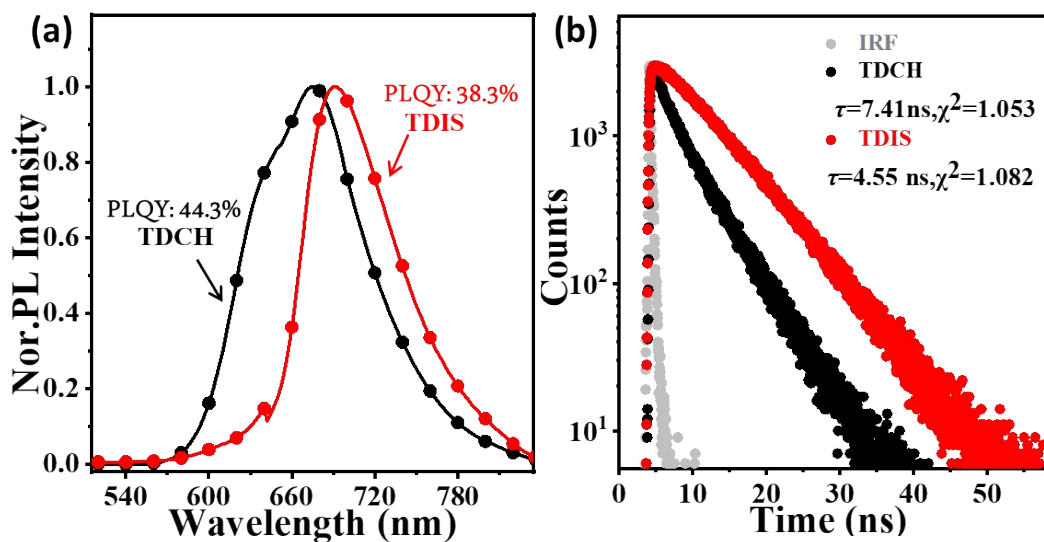

Fig. S7 (a) Steady-state PL spectra and (b) Time-resolved PL decay curves of TDCH and TDIS crystalline powder.

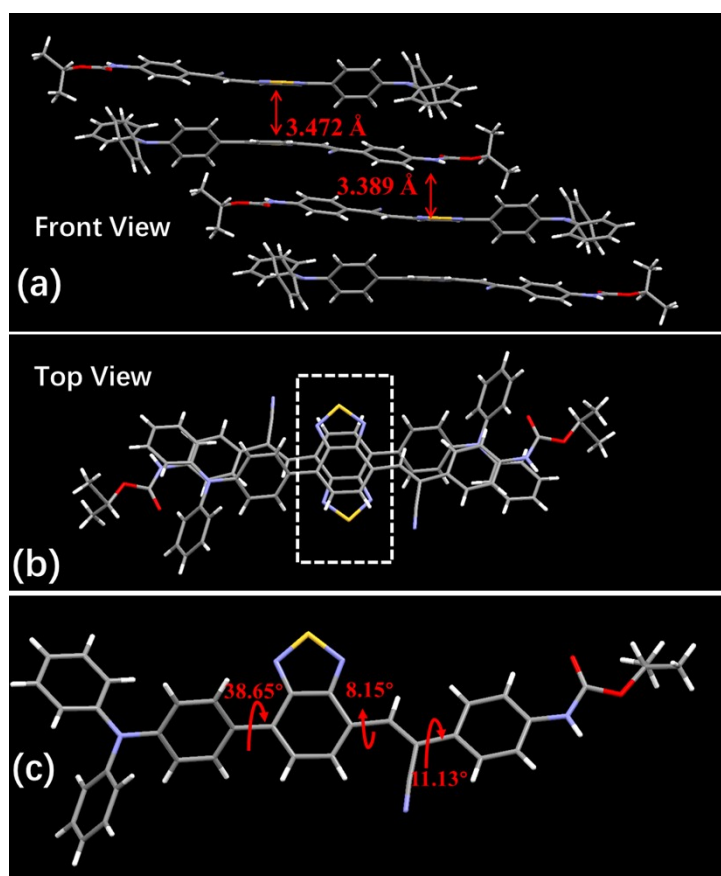

Fig. S8 Crystal structures of TDIS: (a) Lateral view of the column arrangement; (b) top view of the TDIS; (c) and the dihedral angles of the TDIS single-crystal.

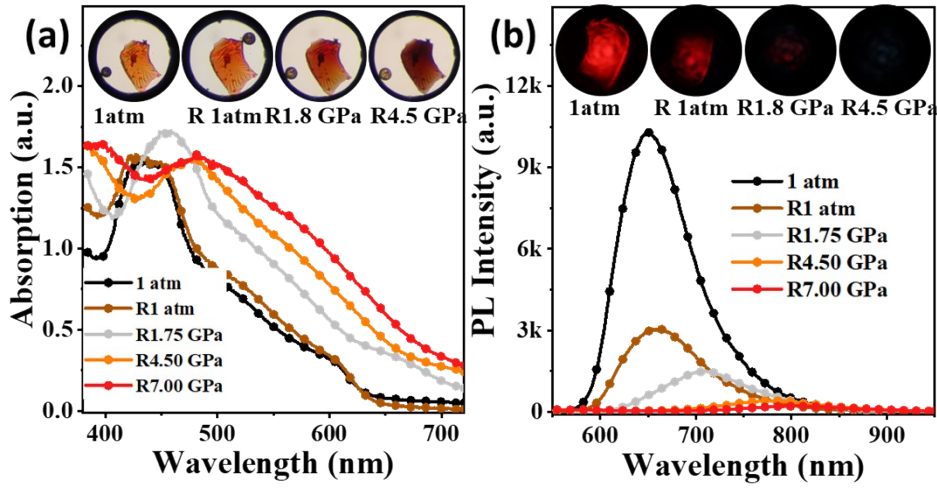

Fig. S9 The UV absorption spectra (a) and PL spectra (b) of TDCH crystals during the depressurizing process.

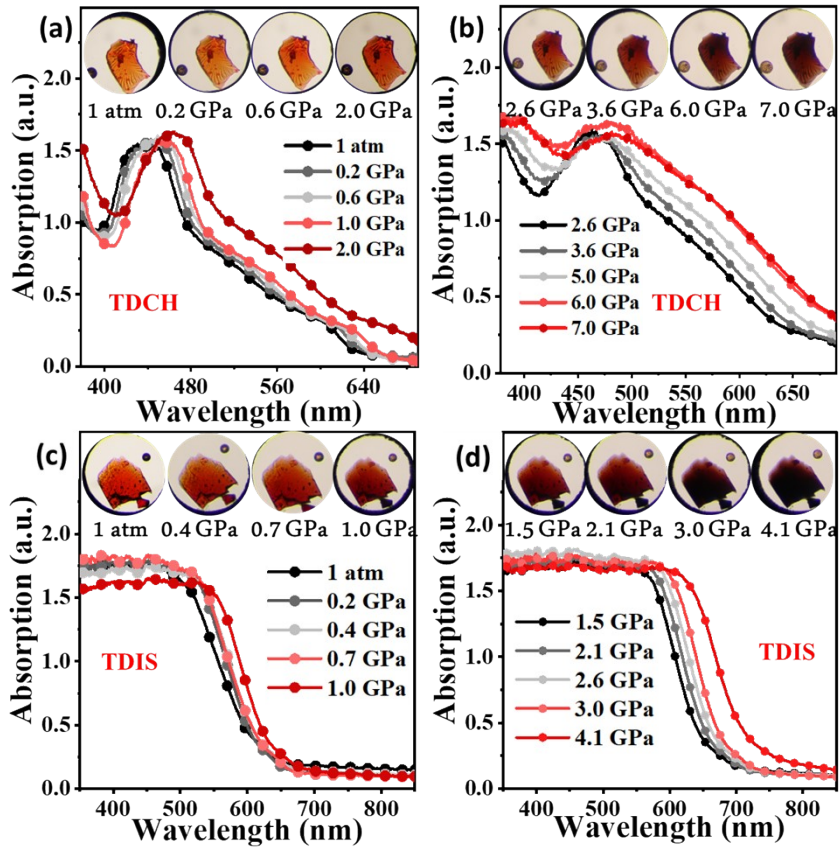

Fig. S10 Absorption spectra of TDCH (a, b) and TDIS (c, d) crystalline powders under different hydrostatic pressures.

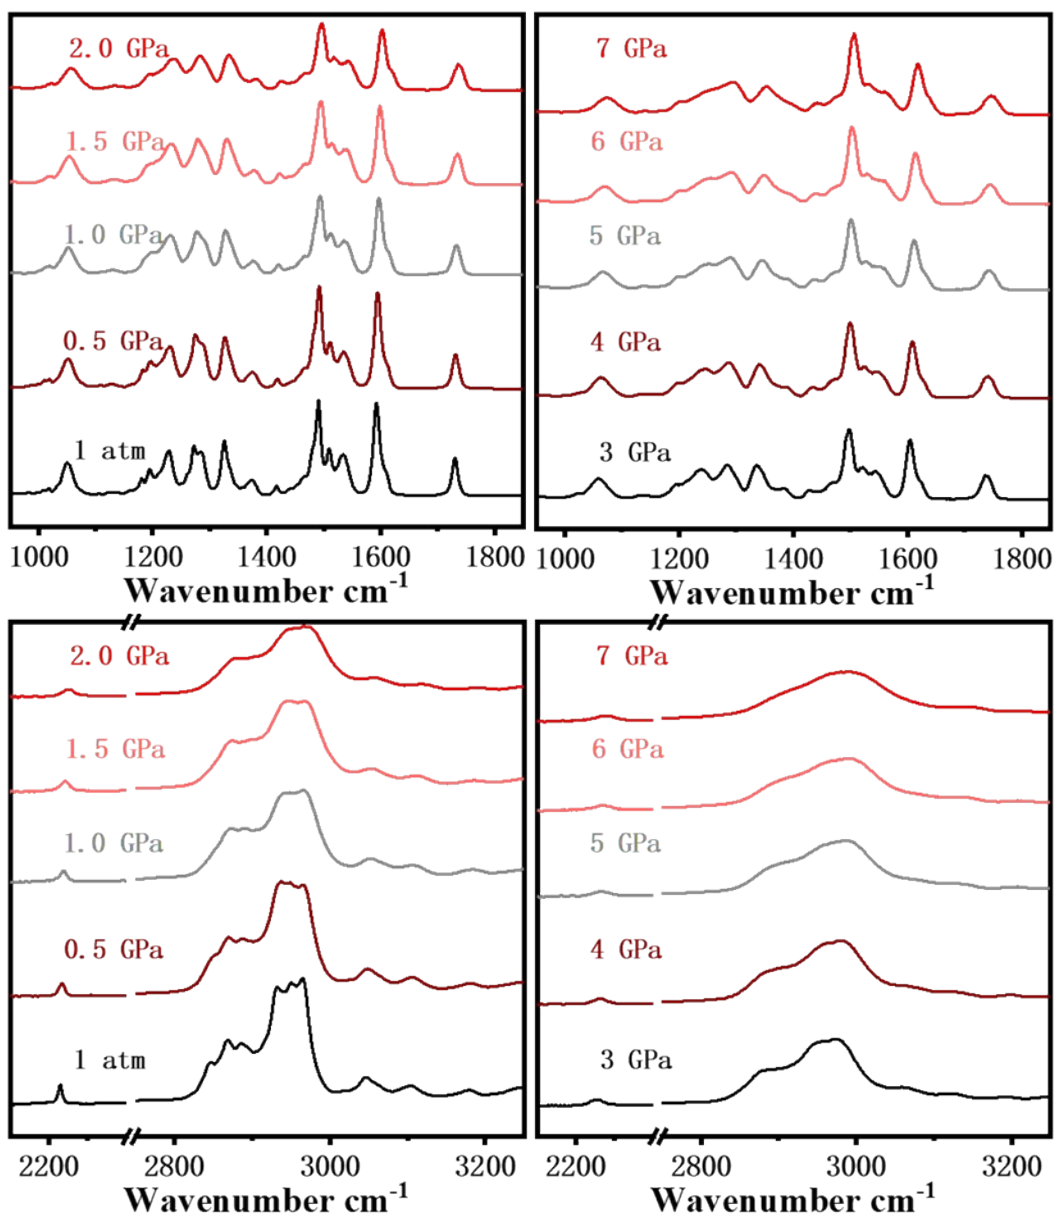

Fig. S11 IR spectra of TDCH crystals in the range of 1000-3200  $\text{cm}^{-1}$  at various pressures

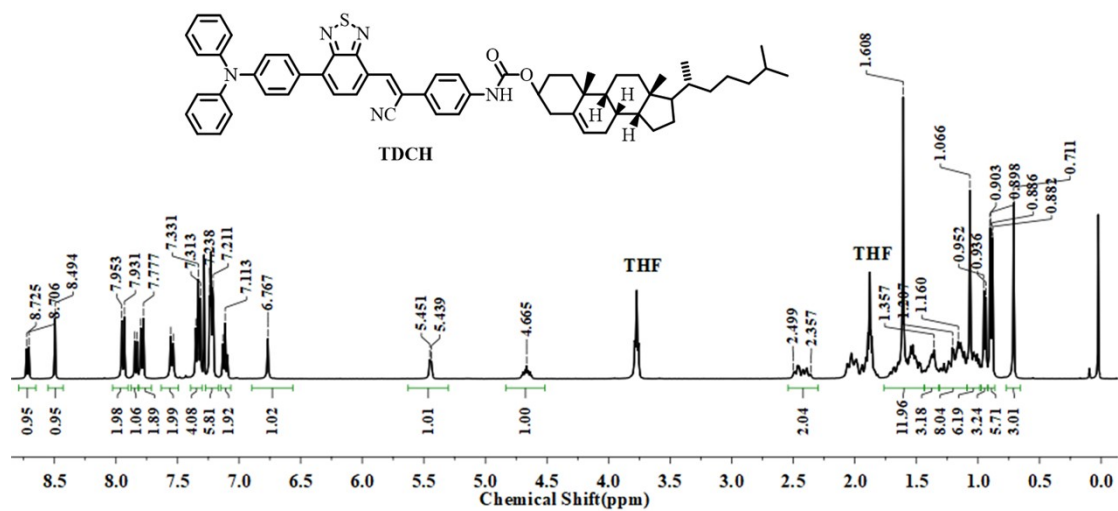

**Fig. S12** The  $^1\text{H}$  NMR spectrum of **TDCH** in the  $\text{CDCl}_3$ .

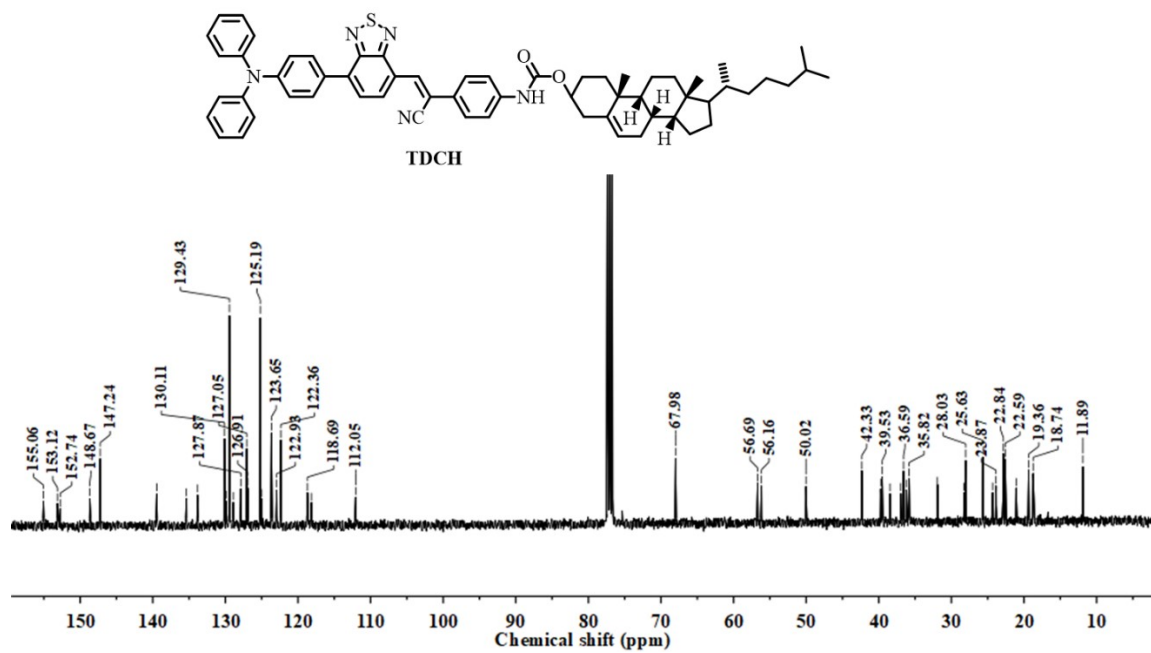

**Fig. S13** The  $^{13}\text{C}$  NMR spectrum of the **TDCH** in the  $\text{CDCl}_3$ .

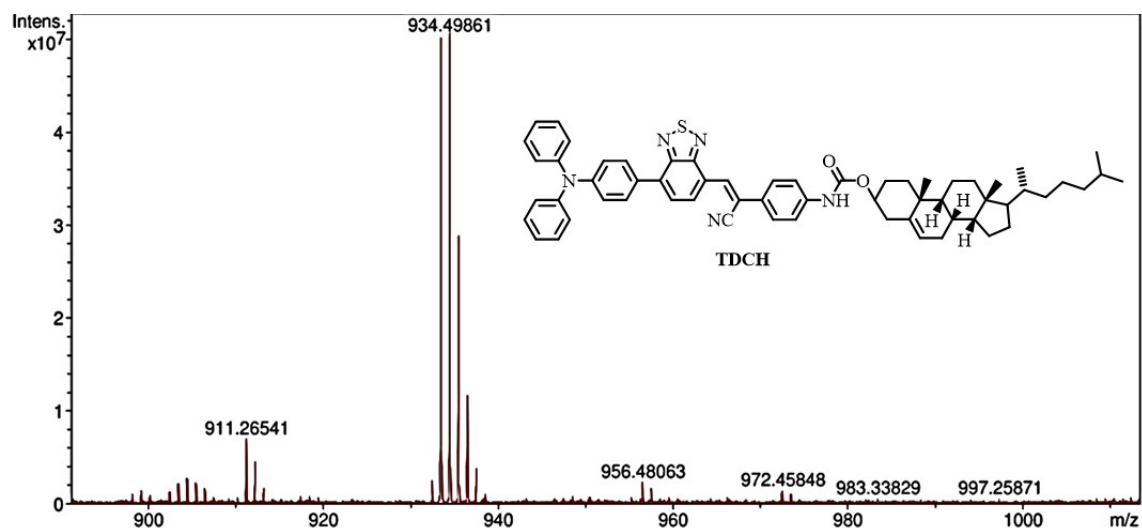

Fig. S14 The HRMS spectrum of the TDCH.

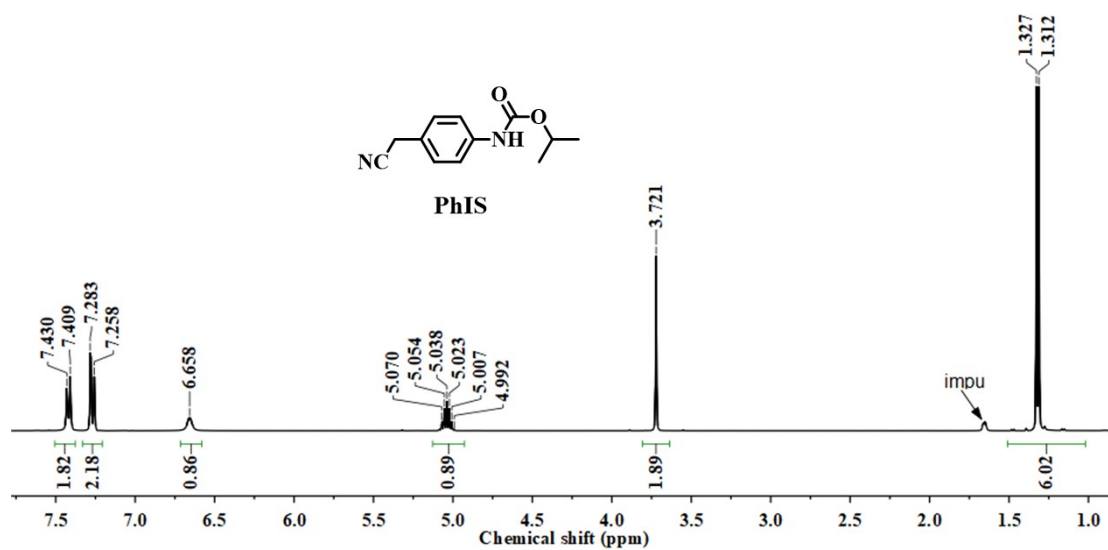

Fig. S15 The  $^1\text{H}$  NMR spectrum of PhIS in the  $\text{CDCl}_3$ .

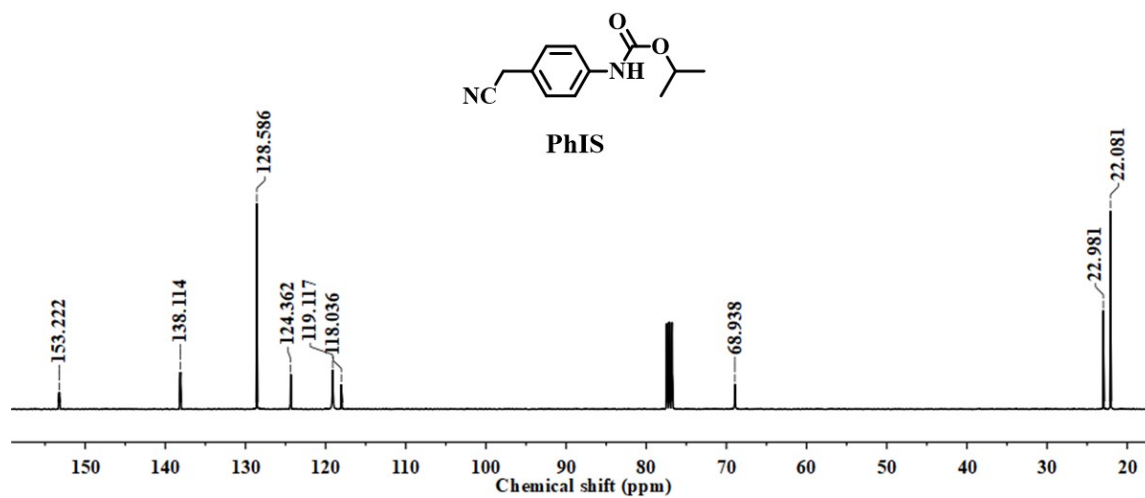

**Fig. S16** The  $^{13}\text{C}$  NMR spectrum of the **PhIS** in the  $\text{CDCl}_3$ .

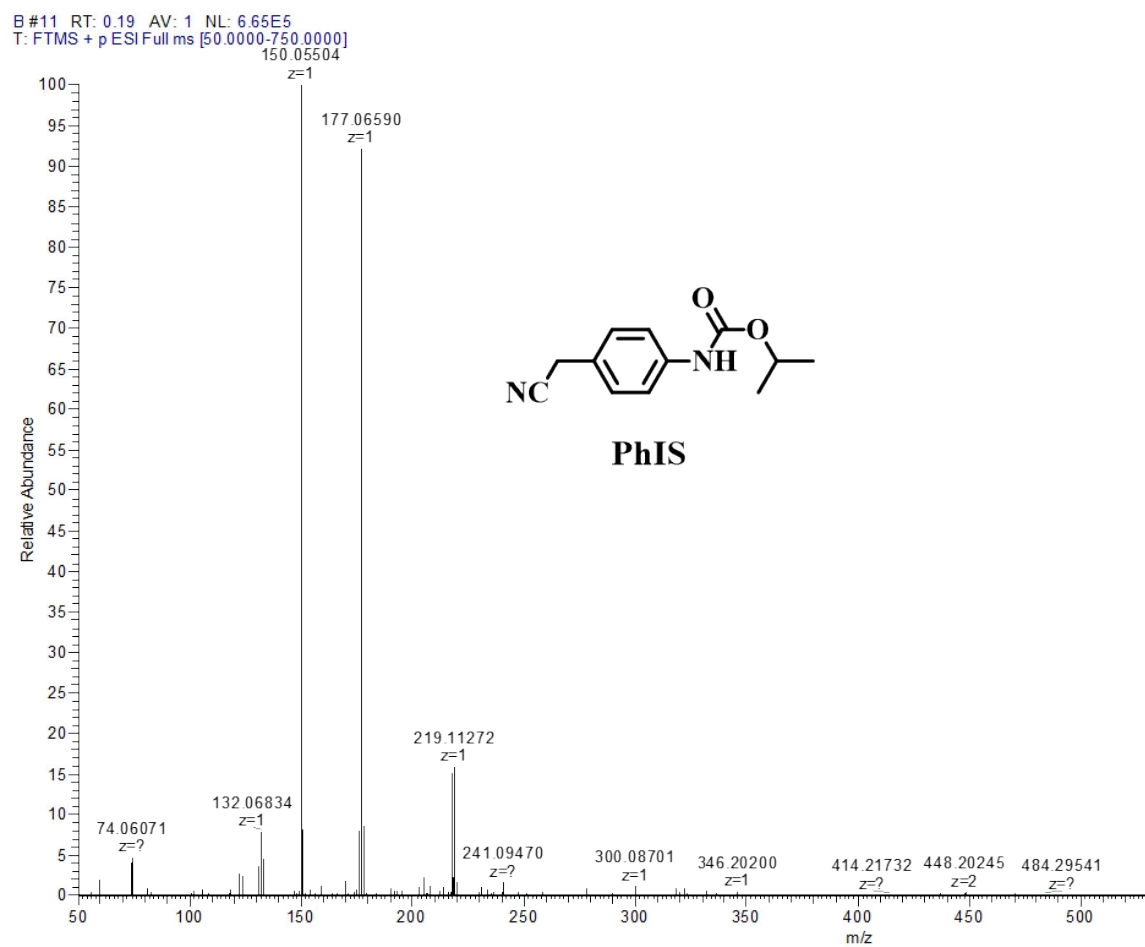

**Fig. S17** The HRMS spectrum of the **PhIS**.

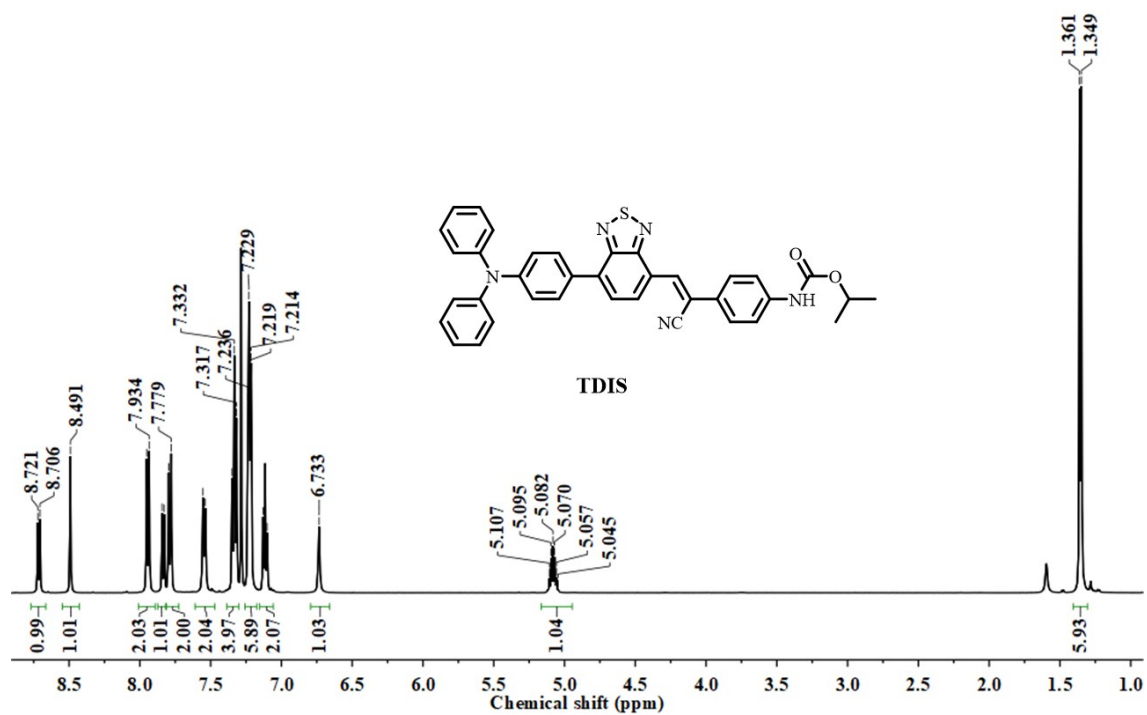

Fig. S18 The  $^1\text{H}$  NMR spectrum of TDIS in the  $\text{CDCl}_3$ .

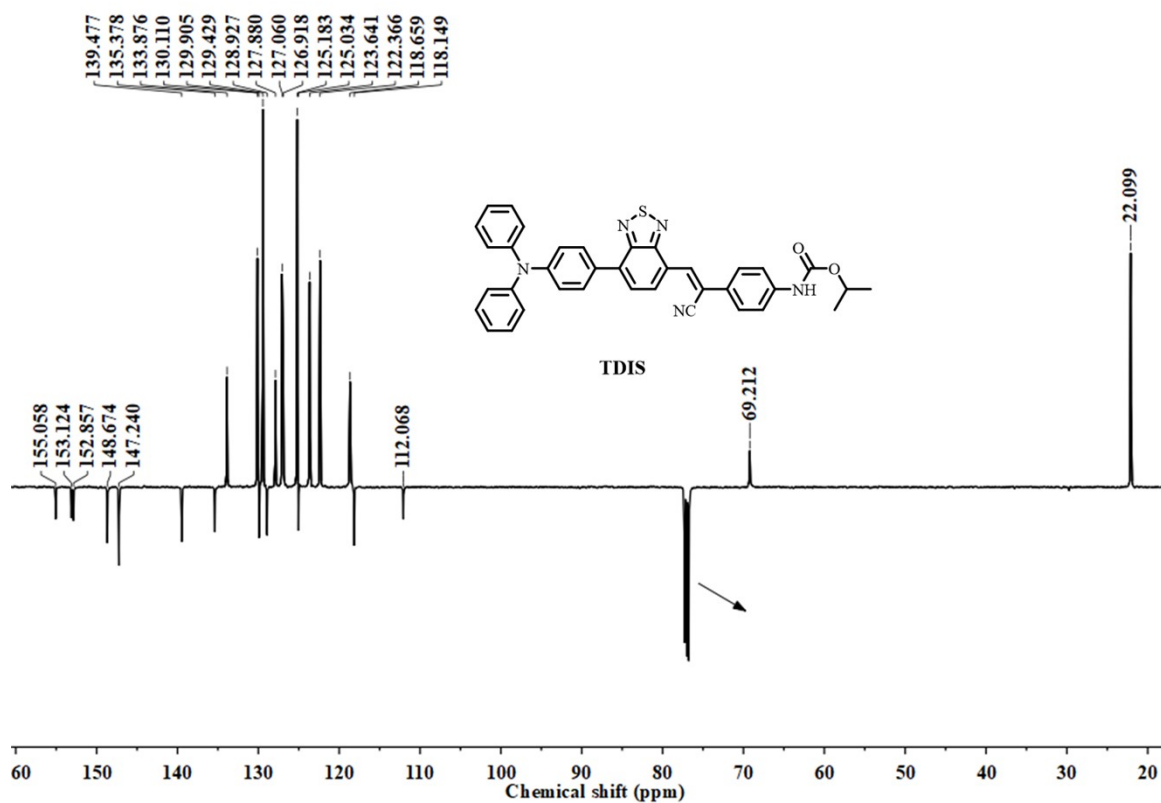

Fig. S19 The  $^{13}\text{C}$  NMR spectrum of the TDIS in the  $\text{CDCl}_3$ .

9611#13 RT: 0.20 AV: 1 NL: 2.26E5  
T: FTMS + p ESI Full ms [100.0000-1500.0000]

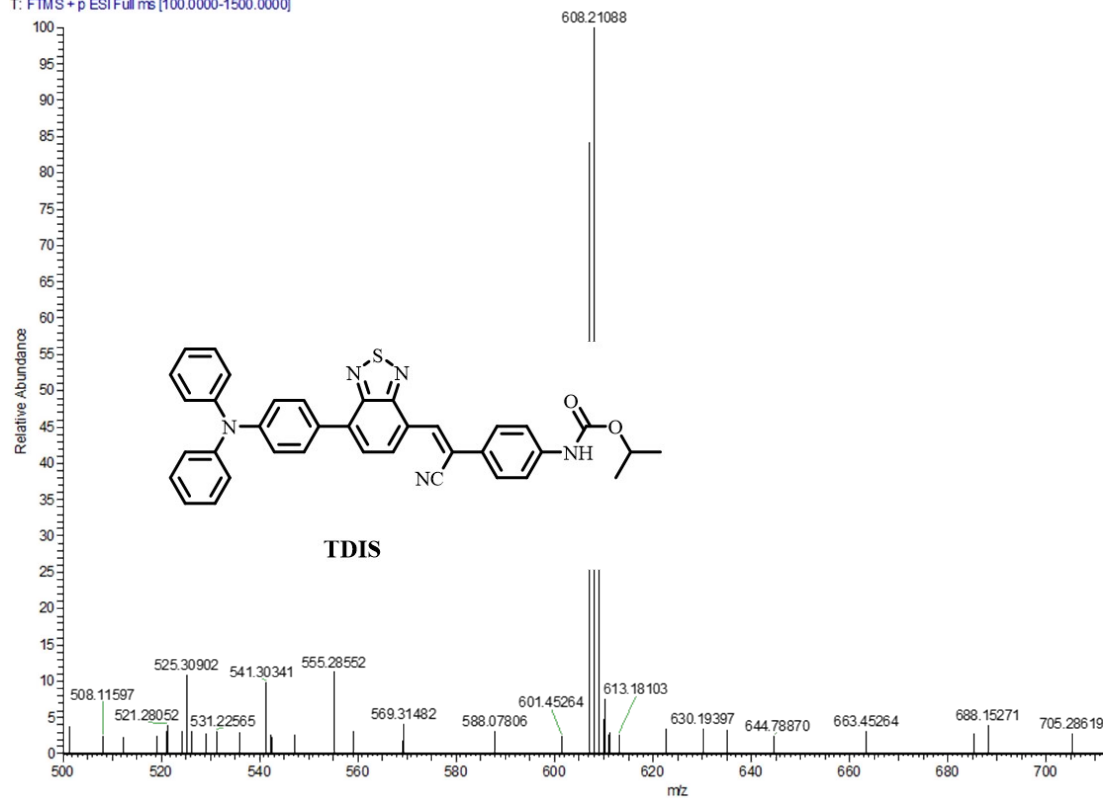

**Fig. S20** The HRMS spectrum of the **TDIS**.
